# Supplementary figures and images for: Cobalt-doped tin disulfide catalysts for high-capacity lithium–air batteries with high lifetime
Source: Royal Society of Chemistry journal article supplement (doi:10.1039/d3cp02474a), 2023-01-01

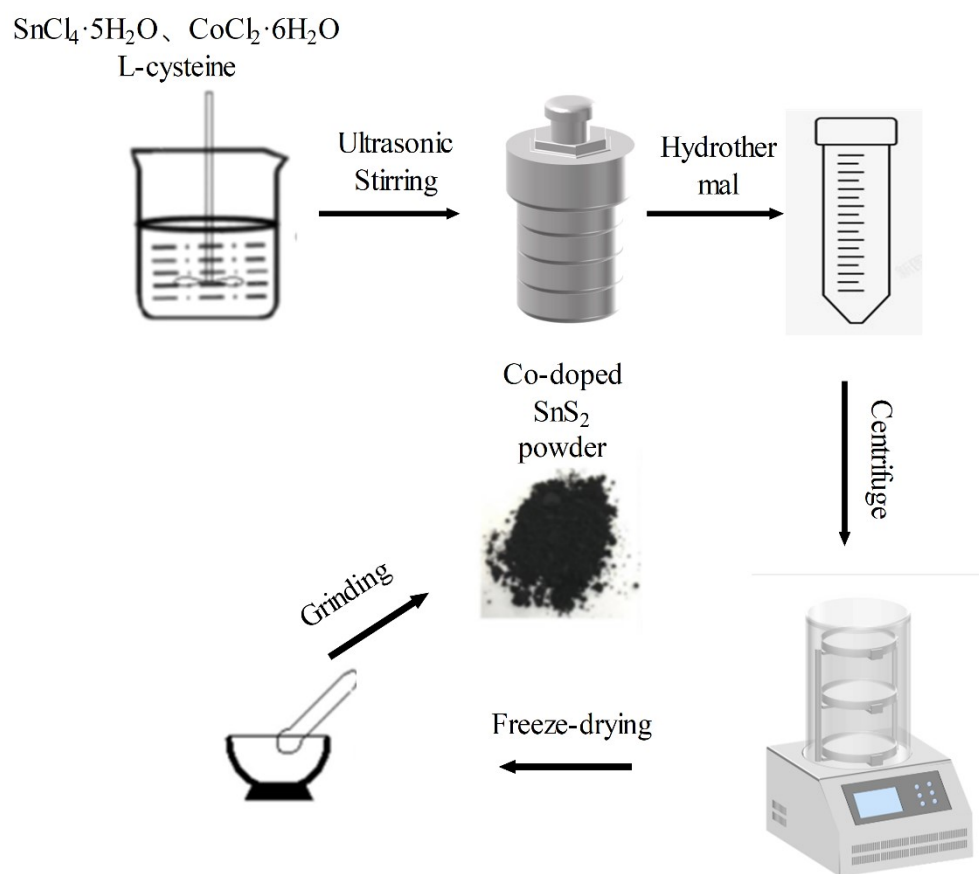

FigureS1

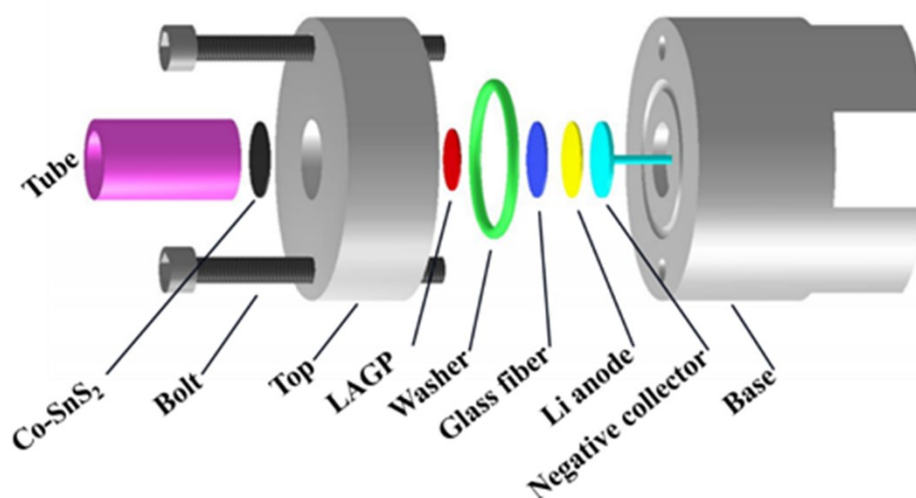

FigureS2

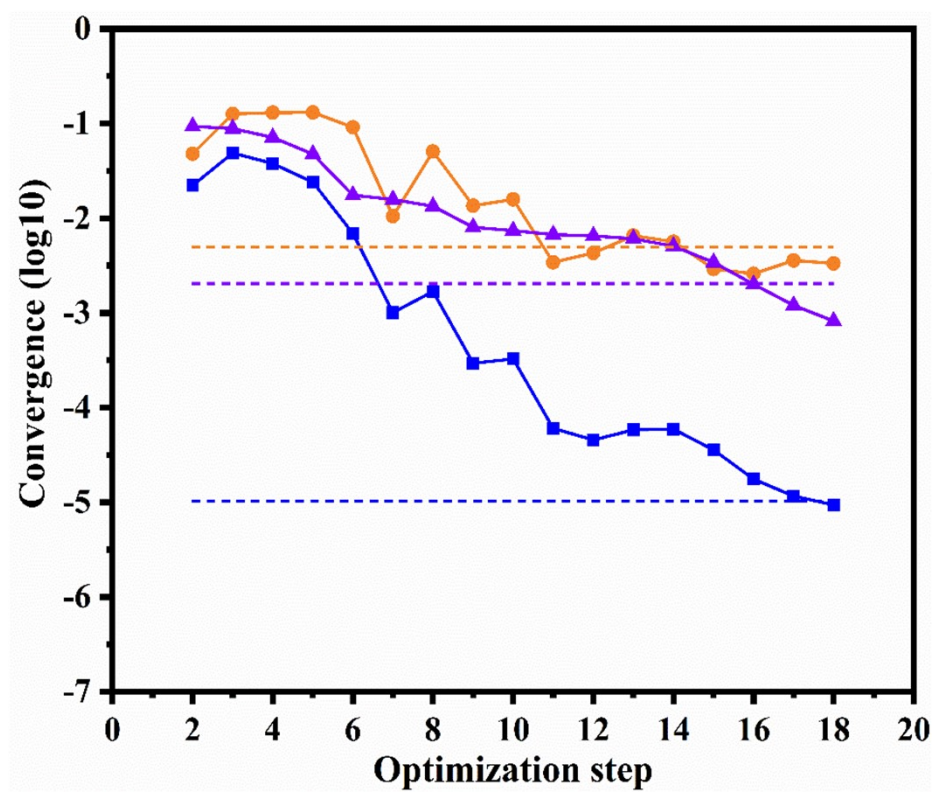

FigureS3

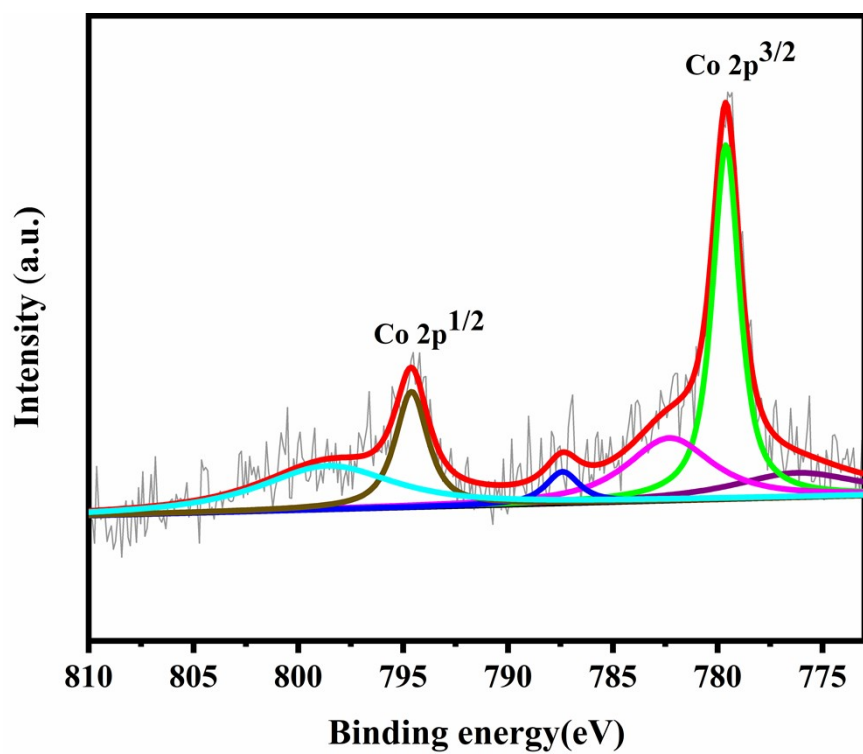

FigureS4

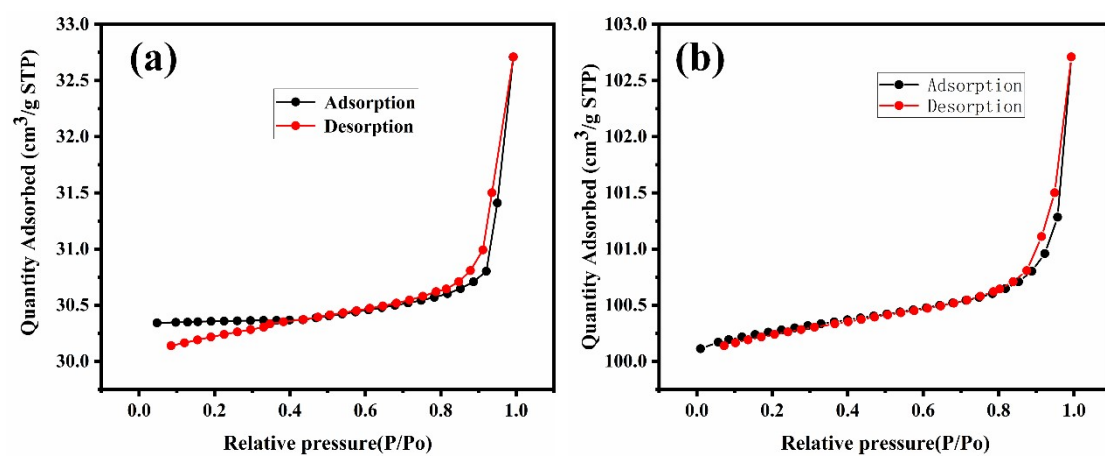

FigureS5

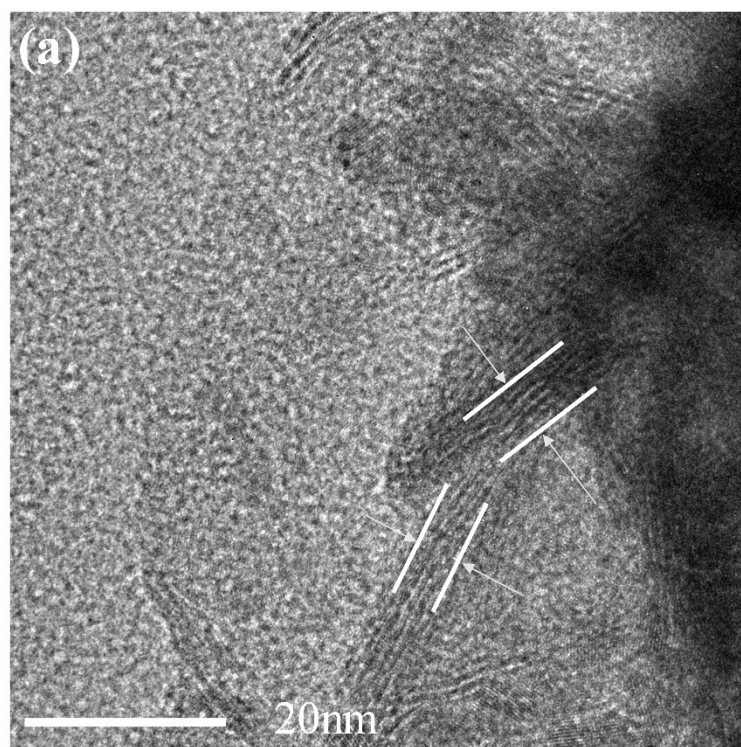

FigureS6

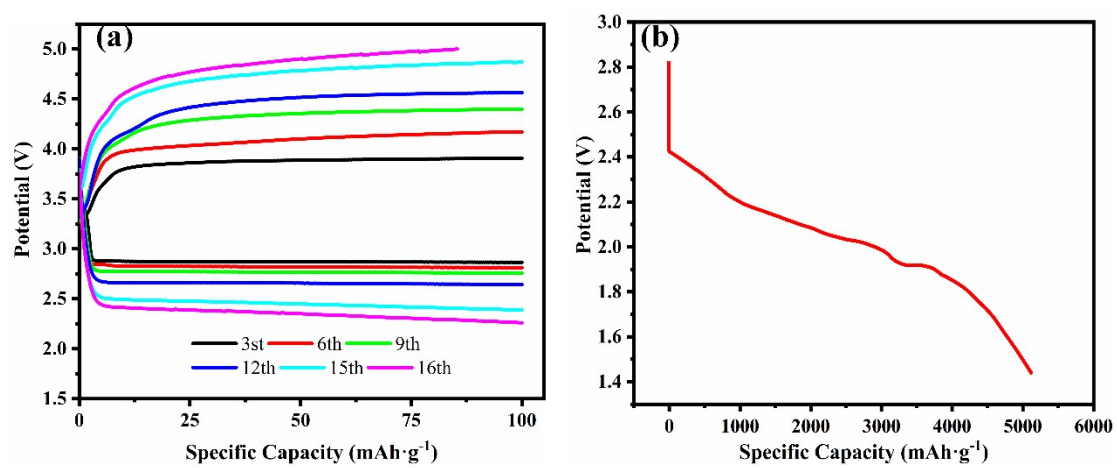

FigureS7

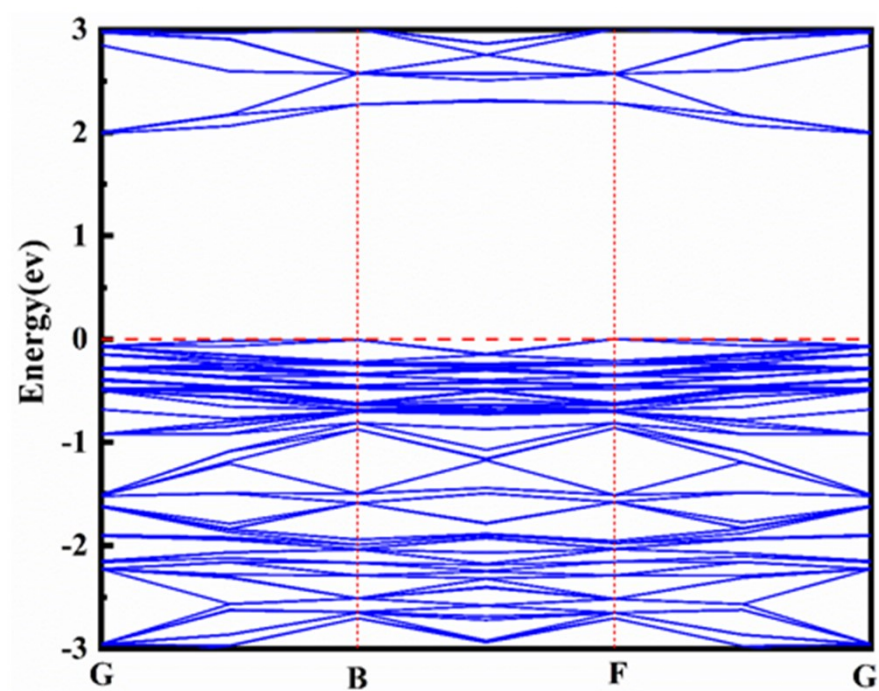

FigureS8

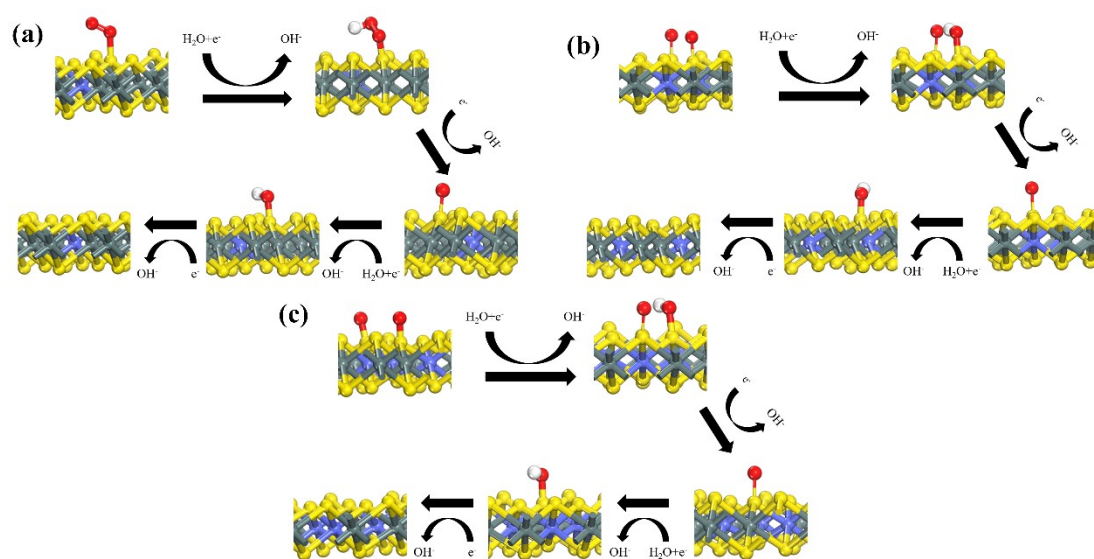

FigureS9

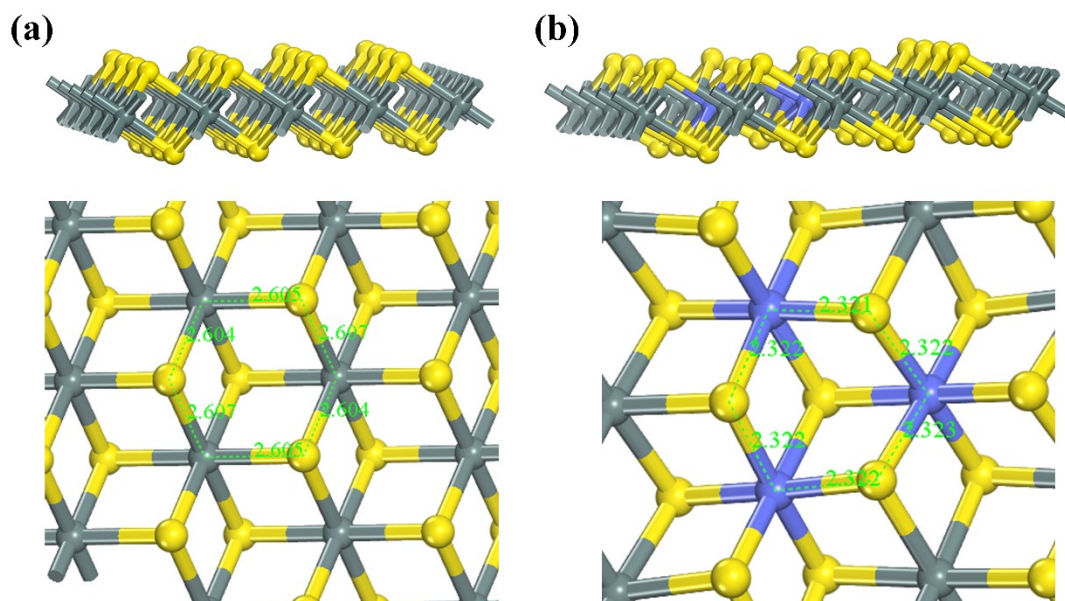

FigureS10

Supplement: d3cp02474a1.pdf [file d3cp02474a1.pdf]
